# Supplementary material for: A graphene oxide/polyaniline nanocomposite biosensor: synthesis, characterization, and electrochemical detection of bilirubin
Source: Royal Society of Chemistry journal article supplement (doi:10.1039/d3ra06815c), 2023-01-01
Supplement: d3ra06815c1.pdf [file d3ra06815c1.pdf]

Sup. Table. 1: Serum bilirubin levels in apparently healthy persons and jaundice patients, as measured by bilirubin biosensor based on BOx/GONP@PANI/ITO electrode

| sex | Age | Healthy person | sex | Age | Healthy person |
|-----|-----|----------------|-----|-----|----------------|
| M   | 29  | 10±0.03        | F   | 36  | 22±0.01        |
| M   | 26  | 12±0.05        | F   | 55  | 21±0.03        |
| F   | 55  | 13±0.02        | M   | 64  | 31±0.04        |
| M   | 79  | 13±0.04        | F   | 39  | 24±0.01        |
| F   | 44  | 09±0.02        | M   | 53  | 25±0.04        |
| F   | 52  | 11±0.02        | M   | 50  | 31±0.02        |
| M   | 47  | 14±0.03        | M   | 61  | 29±0.04        |
| F   | 36  | 15±0.03        | F   | 40  | 38±0.03        |
| F   | 19  | 07±0.05        | F   | 45  | 40±0.01        |
| M   | 25  | 06±0.05        | F   | 39  | 38±0.05        |
| F   | 16  | 0.3±0.01       | M   | 42  | 38±0.01        |
| F   | 62  | 12±0.03        | M   | 50  | 42±0.03        |
| M   | 53  | 05±0.02        | F   | 47  | 38±0.02        |
| M   | 47  | 08±0.02        | M   | 41  | 39±0.03        |
| F   | 55  | 13±0.03        | M   | 34  | 43±0.02        |
| M   | 21  | 0.3±0.02       | M   | 33  | 48±0.02        |
| M   | 24  | 09±0.01        | F   | 46  | 45±0.01        |
| F   | 52  | 08±0.05        | M   | 46  | 58±0.04        |
| M   | 60  | 06±0.02        | F   | 40  | 57±0.03        |
| F   | 22  | 12±0.01        | F   | 27  | 53±0.01        |
| M   | 55  | 06±0.03        | F   | 33  | 55±0.03        |
| M   | 54  | 08±0.03        | M   | 45  | 58±0.05        |
| F   | 56  | 05±0.05        | F   | 43  | 54±0.06        |
| F   | 19  | 0.3±0.02       | F   | 19  | 51±0.01        |
| M   | 21  | 02±0.01        | M   | 45  | 61±0.03        |
| M   | 27  | 01±0.03        | F   | 35  | 60±0.02        |
